## **Circular RNA profiling reveals abundant and diverse circRNAs of SARS-CoV-2, SARS-CoV and MERS-CoV origin**

Shaomin Yang<sup>1,4,\*</sup>, Hong Zhou<sup>2,\*</sup>, Ruth Cruz-Cosme<sup>2</sup>, Mingde Liu<sup>3</sup> Jiayu Xu<sup>3</sup>, Xiaoyu Niu<sup>3</sup>, Yaolan Li<sup>1</sup>, Lizu Xiao<sup>4</sup>, Qihong Wang<sup>3</sup>, Hua Zhu<sup>1,5,†</sup>, Qiyi Tang<sup>2,†</sup>.

<sup>1</sup> College of Pharmacy and College of Life Science and Technology, Jinan University, Guangzhou, Guangdong 510632, China.

<sup>2</sup> Department of Microbiology, Howard University College of Medicine, 520 W Street NW Washington, DC 20059, USA.

<sup>3</sup> Food Animal Health Research Program, Ohio Agricultural Research and Development Center, College of Food, Agriculture and Environmental Sciences, Department of Veterinary Preventive Medicine, College of Veterinary Medicine, The Ohio State University, Wooster, OH, USA.

<sup>4</sup> Department of Pain Medicine and Shenzhen Municipal Key Laboratory for Pain Medicine, Shenzhen Nanshan People's Hospital, The 6th Affiliated Hospital of Shenzhen University Health Science Center, Shenzhen, China.

<sup>5</sup> Department of Microbiology and Molecular Genetics, New Jersey Medical School, Rutgers University, 225 Warren Street, Newark, NJ 070101, USA.

Author list footnote:

\*Co-first authors, these authors contributed equally to this work.

†Correspondence to: [zhuhu@njms.rutgers.edu](mailto:zhuhu@njms.rutgers.edu) and [qiyi.tang@hhoward.edu](mailto:qiyi.tang@hhoward.edu)

**Competing Interests:** Authors declare no competing interests.

1 **ABSTRACT**

2

3 Circular RNAs (circRNAs) encoded by DNA genomes have been identified across host and  
4 pathogen species as parts of the transcriptome. Accumulating evidences indicate that circRNAs  
5 play critical roles in autoimmune diseases and viral pathogenesis. Here we report that RNA viruses  
6 of the *Betacoronavirus* genus of *Coronaviridae*, SARS-CoV-2, SARS-CoV and MERS-CoV,  
7 encode a novel type of circRNAs. Through *de novo* circRNA analyses of publicly available  
8 coronavirus-infection related deep RNA-Sequencing data, we identified 351, 224 and 2,764  
9 circRNAs derived from SARS-CoV-2, SARS-CoV and MERS-CoV, respectively, and  
10 characterized two major back-splice events shared by these viruses. Coronavirus-derived  
11 circRNAs are more abundant and longer compared to host genome-derived circRNAs. Using a  
12 systematic strategy to amplify and identify back-splice junction sequences, we experimentally  
13 identified over 100 viral circRNAs from SARS-CoV-2 infected Vero E6 cells. This collection of  
14 circRNAs provided the first line of evidence for the abundance and diversity of coronavirus-  
15 derived circRNAs and suggested possible mechanisms driving circRNA biogenesis from RNA  
16 genomes. Our findings highlight circRNAs as an important component of the coronavirus  
17 transcriptome.

18

19 **Summary:** We report for the first time that abundant and diverse circRNAs are generated by  
20 SARS-CoV-2, SARS-CoV and MERS-CoV and represent a novel type of circRNAs that differ  
21 from circRNAs encoded by DNA genomes.

22

23 **Key words:** SARS-CoV-2; SARS-CoV; MERS-CoV; coronavirus; circular RNA.

## 24 INTRODUCTION

25 Severe acute respiratory syndrome coronavirus 2 (SARS-CoV-2) is a single strand and positive  
26 sense RNA virus and belongs to the *Betacoronavirus* genus of the family of *Coronaviridae* (CoVs).  
27 It is responsible for the ongoing global pandemic of COVID-19. SARS-CoV-2 shares ~80%  
28 homology with severe acute respiratory syndrome coronavirus (SARS-CoV) and is more closely  
29 related with Middle East respiratory syndrome-related coronavirus (MERS-CoV) than other four  
30 commonly circulated human coronaviruses (1, 2). SARS-CoV-2, SARS-CoV and MERS-CoV,  
31 emerged within last two decades and have posed major challenges to global health. However, we  
32 still have very limited understanding of their pathogenicity factors. The transcriptional regulation  
33 of CoV gene expression is complex due to the large size of the genome (~30kb). The first open  
34 reading frame (ORF), ORF1a/1b, is translated from the positive-strand genomic RNA (gRNA) as  
35 a polyprotein, which is cleaved proteolytically into non-structural proteins. ORFs located towards  
36 the 3' side of the genome encode conserved structural proteins, including S (spike protein), E  
37 (envelope protein), M (membrane protein) and N (nucleocapsid protein), and accessory proteins.  
38 These proteins are translated from a set of sub-genomic RNAs (sgRNA) generated through TRS-  
39 L and TRS-B (transcription-regulating sequences from the leader and body) mediated  
40 discontinuous RNA synthesis (3). It is recently revealed that the transcriptome of SARS-CoV-2 is  
41 even more complex with numerous non-canonical discontinuous transcripts produced and  
42 potentially encoding unknown ORFs through fusion, deletion, truncation and/or frameshift of  
43 existing ORFs (4). It is unclear if additional components exist in the transcriptome of SARS-CoV-  
44 2 and other CoVs.

45 Circular RNAs (circRNAs) are a class of single-stranded noncoding RNA species with a  
46 covalent closed circular configuration. CircRNAs are formed either through back-splicing of exons

47 or from intron lariat by escaping debranching (5). CircRNAs are resistant to exonuclease-mediated  
48 degradation and are more stable than linear RNA (6). They may encode proteins (7) or function as  
49 miRNA and protein sponges (8). Recent studies have revealed circRNAs as important pathological  
50 biomarkers for cancers (9), neurological diseases (10) and autoimmune diseases (11). Furthermore,  
51 viral-derived circRNAs have been identified from several DNA viruses, including Epstein-Barr  
52 Virus (12-14), Kaposi Sarcoma Virus (15-17) and human papillomaviruses (18), and are  
53 implicated with a role in pathogenesis (18).

54 In this study, we report the bioinformatical identification and characterization of SARS-  
55 CoV-2-, SARS-CoV- and MERS-CoV-derived circRNAs as a novel type of circRNAs using  
56 publicly available deep RNA-Seq data. We also present the first systematic approach to validation  
57 circRNAs expressed by SARS-CoV-2. We experimentally identified over 100 circRNAs, which  
58 supports the major findings from our bioinformatic analyses. Our results demonstrate the  
59 abundance and diversity of circRNAs derived from RNA viral genomes of beta-coronaviruses,  
60 providing insights into the biogenesis and functions of circRNAs during viral infection.

61

## 62 **RESULTS**

### 63 **Identification of SARS-CoV-2-, SARS-CoV- and MERS-CoV-derived circRNAs and** 64 **characterization of back-splice junction hotspots using CIRI2**

65 It is recommended that bioinformatic analyses of circRNAs are performed on datasets with at least  
66 30 million 100-bp raw reads generated from cDNA libraries prepared from rRNA-depleted total  
67 RNA (19). To look for circRNAs derived from CoV genomes, we identified SARS-CoV-2-,  
68 SARS-CoV- and MERS-CoV-infection-related deep RNA-Seq datasets in the NCBI Gene  
69 Expression Omnibus database. Considering the replication kinetics and tropism of CoVs (20), we

70 chose datasets from GSE153940 (21), GSE56193, and GSE139516 (22), with 24 hours post  
71 infection (hpi) as the timepoint, Vero E6 (African green monkey kidney) cells as the host for  
72 SARS-CoV-2 and SARS-CoV, and Calu-3 (human lung adenocarcinoma) cells as the host for  
73 MERS-CoV. A circRNA enrichment step was included during cDNA preparation for the MERS-  
74 CoV datasets (22), rendering the MERS-CoV datasets more sensitive for circRNA detection.

75 CoVs use an RNA-dependent RNA polymerase (RdRp) to generate genomic RNA and  
76 sgRNA transcripts in the cytoplasm of host cells. We thus reasoned that CoV circRNAs, if existed,  
77 are likely to circularize independent of splicing, which occurs in the nucleus. Several circRNA  
78 prediction algorithms have been developed to identify BSJ reads from RNA-Seq data and to  
79 predict the 5' and 3' breakpoints (23). CIRI2 (23) is the only tool that adopts an MLE-based  
80 algorithm to unbiasedly identify back-splice junction (BSJ) reads independent of a circRNA  
81 reference annotation file. It is more sensitive and accurate than two other *de novo* circRNA  
82 identification tools (23). Therefore, we used the recommended CIRI2 pipeline (24) to perform *de*  
83 *novo* circRNA discovery and assembly.

84 To improve the assembly accuracy and to simplify follow-up comparison, we combined  
85 reads of biological triplicates into single datasets. After mapping with BWA-MEM (25), we  
86 obtained 1,216,403,242 total reads from the SARS-CoV-2 dataset with 36.6% mapped to SARS-  
87 CoV-2. The MERS-CoV dataset had a similar percentage (30.2% of 316,893,928 total reads)  
88 mapped to the viral genome. And 87.0% of the 1,127,121,362 total reads from the SARS-CoV  
89 dataset was mapped to SARS-CoV. The SARS-CoV-2 and SARS-CoV datasets showed sharp  
90 peaks at the 5' leader sequence and high coverage towards the 3' end of the genome (Figure 1A  
91 and 1B). Genome coverage of the MERS-CoV dataset was substantially lower due to the removal

92 of linear RNAs by RNase R (Figure 1A and 1B). We observed above-threshold coverage in the last  
93 5,000 nucleotides (nt) of the MERS-CoV genome, corresponding to E, N, ORF8b and the 3'UTR.

94 CIRI2 identifies circRNAs by aligning chimeric reads to the 3' donor sequence and the 5'  
95 acceptor sequence and determining the exact breakpoints of the BSJ (Figure 1C). By this definition,  
96 we identified 351 SARS-CoV-2 circRNAs, 224 SARS-CoV circRNAs and 2,764 MERS-CoV  
97 circRNAs. The larger number of circRNAs identified from MERS-CoV genome compared to  
98 SARS-CoV2 and SARS-CoV demonstrates the efficiency of circRNA enrichment with RNase R  
99 digestion. While the majority of CoV-derived circRNAs had very low (<10) BSJ-spanning reads,  
100 14 SARS-CoV-2 circRNAs (4%), 3 SARS-CoV circRNAs (1%) and 68 MERS-CoV circRNAs  
101 (2%) had over 1,000 BSJ-spanning reads (Figure 1D-1F and S1F). An additional 3-6% of the  
102 identified circRNAs had 300-1,000 BSJ-spanning reads (Figure 1D-1F). In fact, the most abundant  
103 circRNA identified in each CoV dataset had >10,000 BSJ-spanning reads (SARS-CoV-  
104 2\_29122|29262: 10,763; SARS-CoV\_28136|28606: 13,690; MERS-CoV\_1503|29952: 29,467).  
105 While more circRNAs were identified from the host genomes (monkey: 10,291; human: 43357),  
106 the overall expression level of host circRNAs is much lower compared to CoV circRNAs (Figure  
107 S1F).

108 To examine the circRNA landscape, we mapped all identified circRNAs by the 5' and 3'  
109 breakpoints of the BSJs to their respective genomic locations and estimated the back-splicing  
110 frequency by counting the reads spanning the BSJs (Figure 1D-1F). We identified two major types  
111 of back-splicing events shared by all three CoVs: 1) long-distance back-splicing between the 3'  
112 end of the genome and the 5' end of the genomes; 2) local back-splicing in regions corresponding  
113 to the N gene of SARS-CoV-2 and SARS-CoV and the 3'UTR of MERS-CoV). We also noticed  
114 back-splicing events that specifically occur in SARS-CoV-2 or MERS-CoV. Local back-splicing

115 around position 1500-2500 (Nsp2), 5500-6500nt (Nsp3) and 22000-23000nt (S) of the MERS-  
116 CoV genome occurred at high frequency (Figure 1F), whereas middle-distance back-splicing from  
117 SARS-CoV-2 genomic region 7501-8000 (Nsp3) to 1-500 (5'UTR) and from 27501-28000  
118 (ORF7a/ORF7b) to 22001-22500nt (S) was observed at high frequency (Figure 1D).

119 Next, we performed *de novo* reconstruction and quantification of full-length SARS-CoV-  
120 2, SARS-CoV and MERS-CoV circRNAs using the CIRI-full (24) algorithm. We got 300  
121 reconstructed SARS-CoV-2 circRNAs, of which 127 (42.3%) were full-length. Of 201 assembled  
122 SARS-CoV circRNAs, 122 (60.7%) were full-length. We also got 1,024 reconstructed MERS-  
123 CoV circRNAs, with 81.6% were fully assembled, suggesting that RNase R treatment improves  
124 circRNA reconstruction. *De novo* assembly of host circRNAs resulted in 4,815 (49.9%) full-length  
125 monkey circRNAs and 31,808 (100%) full-length human circRNAs.

126 Furthermore, we compared the features of circRNAs derived from CoVs with those from  
127 the host genomes. The length of nuclear genome-derived circRNAs (nu-circRNAs) is highly  
128 conserved across species with the majority ranging from 250 to 500 nt (24). We observed similar  
129 length distribution in full-length monkey and human genome-derived circRNAs (Figure 2A). CoV  
130 circRNAs shared a different length distribution pattern (Figure 2B). The average length of SARS-  
131 CoV-2 and MERS-CoV circRNAs was over 150 nt longer than that of the host circRNAs (Figure  
132 2A and 2B). And more SARS-CoV-2 and MERS-CoV circRNAs were over 1,000 nt long whereas  
133 host circRNAs are rarely over 750 nt in length. Since CoV have both positive and negative  
134 genomic and subgenomic RNAs, we examined the strandness of CoV circRNAs. CircRNAs  
135 generated by both host genomes showed no strand preference (Vero: 51.9% positive-stranded;  
136 Calu-3: 51.0% positive-stranded). In contrast, 59.5% of SARS-CoV-2 circRNAs, 56.3% of SARS-

137 CoV circRNAs, and 85.1% of MERS-CoV circRNAs were negative-stranded (Figure 2A). This  
138 result suggests that CoV circRNAs have a preference for negative strand.

139 Nu-circRNAs with the same BSJ often have a diverse number of forward-splicing junctions  
140 (FSJs) and circRNA exons due to alternative intron retention (24). sgRNA with canonical and non-  
141 canonical FSJs have been observed in CoVs (3, 4), suggesting that CoV circRNAs may also have  
142 FSJs and circRNA isoforms. We examined the number of FSJs in full-length host and CoV  
143 circRNAs. While circRNA without FSJ only represent 6% of host circRNAs, the majority of CoV  
144 circRNAs had no FSJ (SARS-CoV-2: 64.6%; SARS-CoV: 82%; MERS-CoV: 83.3%).  
145 Additionally, only 1 FSJ could be detected in predicted full-length CoV circRNAs, whereas about  
146 50% of host circRNAs had at least 2 FSJs (Figure 2D). Next, we looked for predicted full-length  
147 CoV circRNAs that share the same BSJ breakpoints but differ in length. We found that MERS-  
148 CoV circRNA 1262|29148 produces two isoforms, both of which contain one FSJ. The longer  
149 isoform (1,051nt) has the FSJ 2223|29060, whereas the shorter isoform (155nt) has the FSJ  
150 1316|29049. This result shows that very few CoV circRNAs could have isoforms.

151 In conclusion, we analyzed SARS-CoV-2, SARS-CoV and MERS-CoV related deep RNA-  
152 Seq datasets, and identified a large amount of CoV circRNAs. The circRNAs of CoV origin have  
153 features in common and can be distinguished from circRNAs derived from the human and monkey  
154 host genomes. We have shown that CoV circRNAs are expressed at higher level and longer in  
155 length than host circRNAs and tends to be negative stranded. We identified BSJ hotspots for  
156 circRNAs derived from each CoV, and found that distant back-splicing from the tail of the genome  
157 to the head of the genome and local back-splicing in regions corresponding to the N gene and the  
158 3'UTR occur at the highest frequency.

159



## 160 **Experimental detection and analysis of SARS-CoV-2 circRNAs**

161 We extracted total RNA from Vero E6 cells mock-treated or infected with SARS-CoV-2 at 24 hpi.  
162 Forward and reverse divergent primers were designed to maximize the chances of amplifying BSJ  
163 sequences (Figure 3A and 3B). To validate the two major back-splicing events, we performed  
164 inverse RT-PCR with primer pairs that targeting either the distant BSJ hotspot 29001-29903|1~500  
165 or the local BSJ hotspots 28501~29500|27501~28500 (Figure S2A-S2C). We also performed  
166 inverse RT-PCR with divergent primer sets targeting the most abundant SARS-CoV-2 circRNAs  
167 predicted by CIRI2 (Figure 3C). Majority of the inverse RT-PCR reactions using the infected  
168 sample as template resulted in products ranging from 200bp to 800bp, whereas no amplification  
169 was seen from the mock samples. Notably, many candidate inverse RT-PCR products were more  
170 abundant than that of circHIPK3, a known highly expressed human circRNA that served as a  
171 positive control (Figure 3C, S2A and S2B). We gel-purified candidate PCR products based on the  
172 size, subcloned by TA cloning, and Sanger-sequenced at least 8 colonies for each candidate BSJ  
173 sequence. The sequencing results revealed the surprising diversity of SARS-CoV-2 circRNAs and  
174 support our predictions from the bioinformatic analyses. First, all gel-purified bands represent  
175 more than one PCR product of the same size. While highly expressed circRNAs, such as  
176 29194|27797 and 28853|28467, represent over 50% of the confirmed clones (29194|27797: 5/7  
177 with 29083-F and 27893-R; 28853|28467: 4/8 with 28809-F and 28494-R; Figure 3D and 3F),  
178 most other purified bands contain a variety of circRNAs (data not shown). Secondly, we confirmed  
179 that the breakpoints of a given circRNA is surprisingly flexible. For example, PCR products  
180 amplified by 29668-F/29572-F and 51-R contain a distant BSJ. However, the 3' breakpoint ranges  
181 from genomic location 29,080nt to 29,767nt, and the 5' breakpoint was between genomic location  
182 7nt and 19nt (Figure S3B). When a deviation of 10nt was considered for the breakpoints, the

183 predicted BSJ 29758|8 represent 8 out of the 13 BSJs confirmed by sequencing. Thirdly, both the  
184 distant and the local back-splicing events were validated by multiple BSJs. We detected distant  
185 fusion from ORF6, N, ORF10 and the 3'UTR to the 5' UTR (data not shown). We also detected  
186 local fusion within N, and from N to ORF7a, ORF7b, and ORF8 (data not shown). In summary,  
187 our RT-PCR and sequencing results validated the diversity of SARS2 circRNAs at the genome  
188 level and at the circRNA level.

189 While the inverse RT-PCR was designed to amplify sequences around the BSJs, we  
190 successfully assembled the full-length sequence of circRNA 29122|28295, of 828nt in length,  
191 using a combination of primer sets (29045-F/28443-R, 28486-F/28341-R, 28809-F/28494-R and  
192 28642-F/28553-R). The successful detection of circRNA 29122|28295 with multiple primer pairs  
193 (Figure 3C, 3E, 3G and 3F) and the high rate of detection in subclones (data not shown) indicate  
194 the overwhelming abundance of this circRNA. In fact, this circRNA corresponds to the most  
195 abundant SARS-CoV-2 circRNA 29122|29262 predicted by CIRI2. This result demonstrates the  
196 accuracy of our bioinformatic analysis.

197 To better understand the consistency of SARS-CoV-2 circRNA expression, we probed  
198 SARS-CoV\_29122|28295 in biological replicates of uninfected and infected samples at 8hpi and  
199 24hpi with two divergent primer sets. RT-PCR with a convergent primer pair targeting the N gene  
200 confirmed that the viral titer was comparable among the infected samples (Figure S3A). We found  
201 that the bands (red arrowheads) corresponding to circRNA 29122|28295 were strong in all the  
202 samples except for infected-24hpi-rep2, which is still detectable but significantly lower (Figure  
203 3I). Interestingly, we found that the abundance of others candidate BSJ products (green arrows)  
204 amplified by these primer sets was different between 8hpi and 24hpi samples. This result suggests  
205 that circRNA expression level and pattern could change over the course of infection.

206 We also confirmed a few features of CoV circRNAs characterized bioinformatically. First,  
207 we detected a variety of FSJs in SARS-CoV-2 circRNAs. The major type of FSJ was accompanied  
208 with a long-distance back-splicing to the 5'UTR to create sgRNA-like circRNAs. We found 5  
209 circRNAs that contained FSJ 75|28266 and 4 circRNAs that contained FSJ 76|26480 (data not  
210 shown), suggesting TRS-mediated fusion of the leader sequence with N and M gene, respectively.  
211 Interestingly, the BSJs in sgRNA-like circRNAs were more flexible. The 3' breakpoints ranges  
212 from 28465 to 2927, and the 5' breakpoint ranges from 3 to 40 (Figure S3B). It is likely that these  
213 circRNAs used sgRNAs as template for synthesis. We also detected FSJs that represent  
214 noncanonical "splicing" events. 6066|29068 and 15466|28579 are long-range TRS-L-independent  
215 distant fusion, whereas 28353|28408, 28353|28471, and 28666|28729 represent noncanonical local  
216 fusions in the N genes, all of which are consistent with recent finding of noncanonical fusion in  
217 the SARS-CoV-2 transcriptome (4). Secondly, we confirmed alternative back-splicing events in  
218 SARS-CoV2 circRNAs either with shared 5' breakpoints or shared 3' breakpoints. Distant back-  
219 splicing from various loci in the N gene share the same 5' breakpoints in the 5'UTR, such as  
220 28465|40 and 29273|40. Fusion from the 3' end of the M gene (genomic location 27282nt) to either  
221 the TRS-L (47nt) or TRS-B (26484,) was observed.

222 Two circRNAs with unexpected repetitive back-splicing caught our attention. One had two  
223 different distant back-splicing events (28465|40 and 28526|1) followed by the same TRS-L  
224 dependent fusion, 75|28266 (Figure S3C). The other had two rounds of fusion from 28465 to 28320  
225 followed by a third fusion from 28467 to 28282 (Figure S3D). Since the BSJs within the same  
226 circRNAs were slightly different, it is unlikely to be an artifact of the rolling-cycle amplification  
227 of circRNAs by RT. These two cases suggest that SARS-CoV-2 circRNAs form BSJs independent  
228 of splicing. It is likely that SARS-CoV-2 circRNA are generated through the template-switching

229 mechanism that drives the formation of discontinuous transcripts. In support of this hypothesis,  
230 we found that the upstream sequences of the acceptors were homologous to the donor sequence  
231 (Figure 3D-H, data not shown). TRS-dependent FSJs in SARS-CoV-2 circRNAs had 11-12  
232 homologous nucleotides between the leader and the body sequence. Also, BSJs with 3-6  
233 nucleotides homology around the breakpoint was frequently observed.

234 In conclusion, we have demonstrated that SARS-CoV-2 produces a surprising diversity of  
235 circRNAs that are abundantly present in the infected Vero E6 cells.

236

## 237 **DISCUSSION**

238 CircRNAs are a recently discovered and recognized type of RNA with important roles in  
239 diseases. While some studies have been conducted in the context of viral infection, the focus was  
240 on how host circRNAs respond to infection. So far, only limited viral circRNAs have been  
241 identified from viruses, mostly from large DNA viruses of the family of *herpesviridae*, and the  
242 circular RNA genome of the hepatitis delta virus is the only known closed circRNAs produced  
243 by an RNA virus (26). Here we provide the first line of evidence that RNA genomes of beta-  
244 coronaviruses encode a novel type of circRNAs, which differ from those encoded by DNA  
245 genomes. In this study, we took two approaches: 1) bioinformatically profiling of the circRNA  
246 landscape in SARS-CoV-2, SARS-CoV and MERS-CoV as well as their human and African  
247 green monkey hosts by *de novo* circRNA identification and assembly of public available deep  
248 RNA-Seq datasets using CIRI2; 2) experimentally profiling of the circRNA landscape in SARS-  
249 CoV-2 by systematic capturing and identifying viral circRNAs produced from the predicted BSJ  
250 hotspots.

251 We bioinformatically identified 351, 224 and 2,764 circRNAs derived from SARS-CoV-  
252 2, SARS-CoV and MERS-CoV, respectively (Figure 1D-1F), and experimentally identified more  
253 than 100 SARS-CoV-2 circRNAs (data not shown). Comparing the BSJ landscapes and  
254 frequency among SARS-CoV-2, SARS-CoV and MERS-CoV revealed two major circularization  
255 events shared by all the three CoVs: 1) distant fusion between RNA located at the tail and the  
256 head of the genome; 2) local fusion in the conserved N gene (Figure 1D-1F). These events were  
257 confirmed by experimentally identified circRNAs (Figure 3C-H and S3B). What distinguishes  
258 CoV circRNAs from host circRNAs are the expression level (Figure S1F), the length (Figure 2A  
259 and 2B), the strand preference (Figure 2C), and the circRNA exon number (Figure 2D).

260 The collection of experimentally identified SARS-CoV-2 circRNAs further distinguishes  
261 CoV circRNAs from Nu-circRNAs. First, we observed striking flexibility in the breakpoints of  
262 SARS-CoV-2 circRNAs. Analysis of sequences around the 3' and 5' breakpoints of  
263 experimentally identified SARS-CoV circRNAs suggest that homology-mediated inaccurate  
264 fusion drives the back-splicing event (data not shown), whereas nu-circRNAs tend to splice  
265 accurately on the AGGT splicing signal. Secondly, we found two cases where multiple back-  
266 splicing events occurred in the same circRNAs (Figure S3C and S3D), suggesting back-splicing  
267 occurs as the RNA is synthesized. It further suggests that the RNA configuration could create  
268 BSJ hotspots that enable repetitive back-splicing.

269 As we wrote this manuscript, another group reported the first bioinformatic identification  
270 of circRNAs in SARS-CoV-2, SARS-CoV and MERS-CoV (27). Interestingly, they came to  
271 several opposing conclusions about CoV circRNAs, including the abundance, the strandness and  
272 the expression level. It is likely due to the datasets they used and the circRNA analysis pipeline  
273 and strategy they adopted. First, we chose SARS-CoV-2 and SARS-CoV datasets with higher

274 sequencing depth and pooled biological triplicates before the analysis. As a result, we identified  
275 240 circRNAs shared by CIRI2 and `find_circ` (Figure S1E), twice the number they found. Since  
276 CoV circRNA does not form BSJs through splicing, AG|GT signal-base algorithms are likely to  
277 have an extreme high false discovery rate, which could lead to their opposing conclusion on  
278 strand-preference. Secondly, we chose BSJ-spanning read counts as the indication of abundance  
279 and made comparison between the host and the viral circRNAs of the same dataset. We have  
280 shown that many CoV circRNAs were spliced tail-to-head. Using transcript per million (TPM) as  
281 the index would greatly underestimate the abundance of CoV circRNAs. Similarly, they  
282 considered the span between the 5' and 3' breakpoints of the BSJ is the length of the circRNA,  
283 assuming that CoV circRNAs do not have FSJs, is an unreasonable way to analyze the data. For  
284 our analysis, we only quantified fully assembled circRNAs predicted by CIRI2-full, rendering  
285 our length analysis more reliable. Lastly, the group claimed that the number of circRNA  
286 identified by their pipeline increased over the course of infection. However, our experimental  
287 results suggest that the most abundant SARS-CoV-2 circRNA, 29122|28295, was highly  
288 expressed at 8 hpi and was likely to down-regulated at 24 hpi (Figure 3I). Considering the  
289 flexibility of circRNA BSJs, we have observed experimentally and the inaccuracy of  
290 bioinformatic algorithms in calling circRNAs. We believe using a systematic approach to  
291 examine circRNA expression diversity and abundance at different stages of infection is needed  
292 before any conclusion could be drawn.

293       Taken together, we have demonstrated with bioinformatic analyses and experimental  
294 evidence that a novel class of circRNAs are generated from SARS-CoV-2, SARS-CoV and  
295 MERS-CoV genomes. The CoV circRNA are highly diverse and abundant, comprising an  
296 important part of the CoV transcriptome. Our study provide insight into the biogenesis of CoV

297 circRNA and the functions of CoV circRNAs during pathogenesis and viral replication.  
298 Understanding the nature and biological function of CoV circRNAs will help us to understand  
299 how these viruses evade the host immune system, replicate and course diseases.

300

### 301 **AUTHOR CONTRIBUTIONS**

302 S.Y and H.Z. designed the experiments, S.Y, H.Z., R.C., M.L., J.X., X.N., Q.T., performed the  
303 experiments, S.Y., H.Z., H.Z., Q.T, analyzed the data, H.Z., H.Z., Q.T., Q.W. wrote the paper,  
304 Y.L., L.X, Q.W, H.Z., Q.T, supervised the study.

305

### 306 **ACKNOWLEDGEMENTS**

307 This study was supported by an NIH/NIAID SC1A1112785 (Q.T.), an NIH/DE R01DE028583-01  
308 (subaward to Q.T.), and National Institute on Minority Health and Health Disparities of the  
309 National Institutes of Health under Award Number G12MD007597.

310 The following reagent was deposited by the Centers for Disease Control and Prevention and  
311 obtained through BEI Resources, NIAID, NIH: SARS-Related Coronavirus 2, Isolate USA-  
312 WA1/2020, NR-52281. We thank Dr. Juliette Hanson and Kaitlynn Starr for BSL3 training and  
313 assistance in BSL3-related work. Q.W. and her group were supported by state and federal funds  
314 appropriated to Ohio Agricultural Research and Development Center (OARDC), College of Food,  
315 Agricultural, & Environmental Sciences, The Ohio State University.

316

317 FIGURES AND FIGURE LEGENDS

318 Fig. 1

A

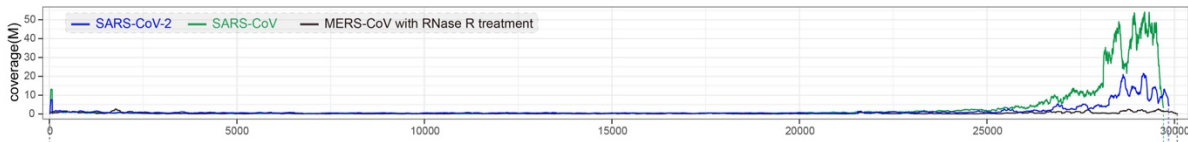

B

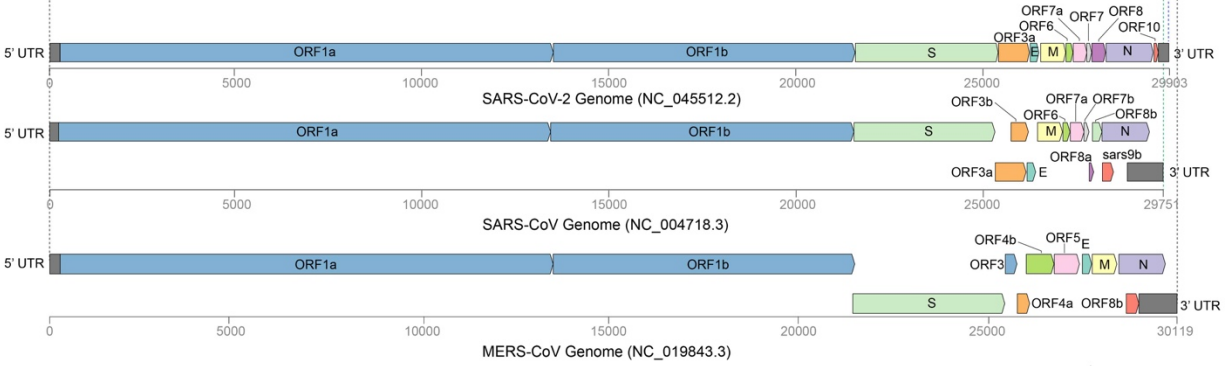

C

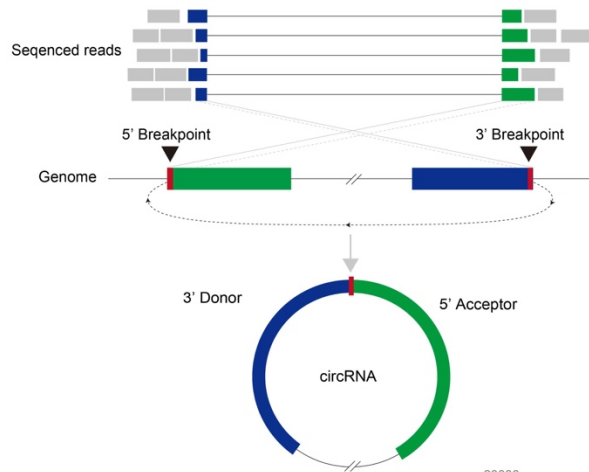

D

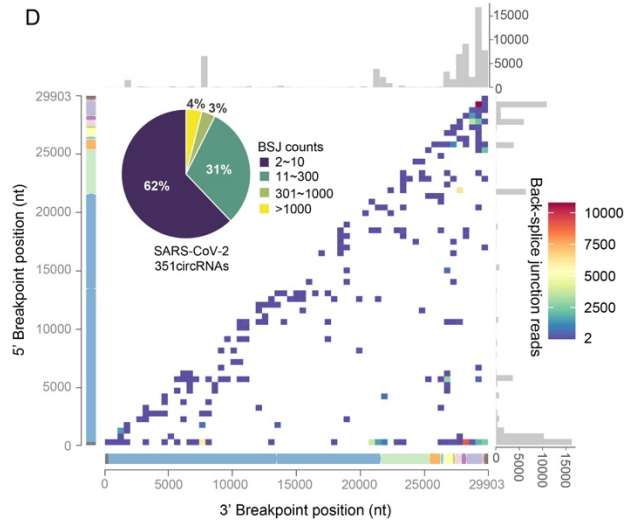

E

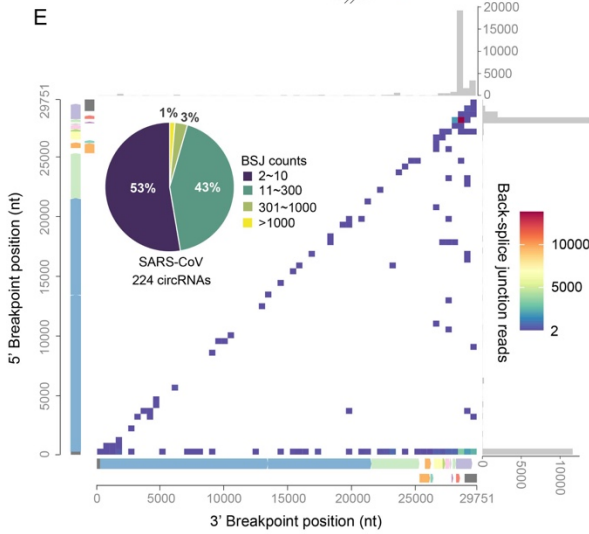

F

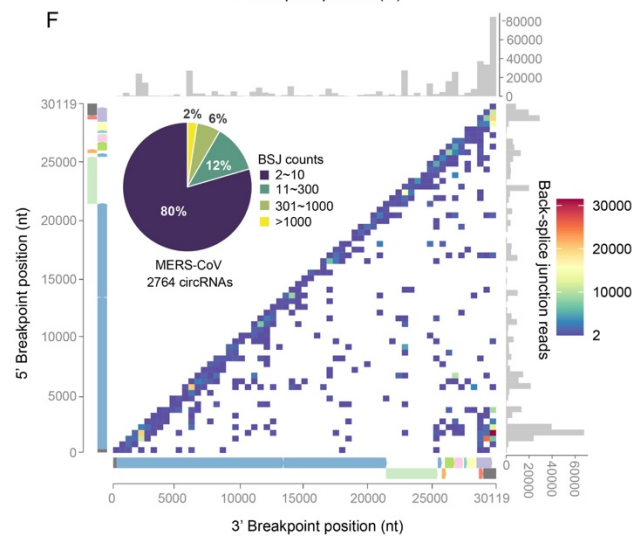

319



320 **Figure 1. Identification of SARS-CoV-2-, SARS-CoV- and MERS-CoV-derived circRNAs.**  
321 **(A)** Coverage of SARS-CoV-2, SARS-CoV and MERS-CoV genomes in CoV-infected related  
322 deep RNA-Seq data. **(B)** Genome organization of SARS-CoV-2, SARS-CoV and MERS-CoV.  
323 **(C)** Illustration of BSJ-spanning reads aligned to the donor and acceptor sequences, and  
324 determination of the 5' and 3' breakpoints. The relative locations of breakpoints in the linear and  
325 circular RNAs are shown. **(D-F)** Frequency of circularization events in SARS-CoV-2 (D),  
326 SARS-CoV € and MERS-CoV (F). Counts of BSJ-spanning reads (starting from a coordinate in  
327 the X axis and ending in a coordinate in the y axis) indicated by color. The counts were  
328 aggregated into 500nt bins for both axes. Distribution of start/end position was shown as  
329 histograms on the x and y axis. The number of identified circRNAs from each CoV genome and  
330 the breakdown of read counts was shown as pie charts.  
331

332 **Fig. 2**

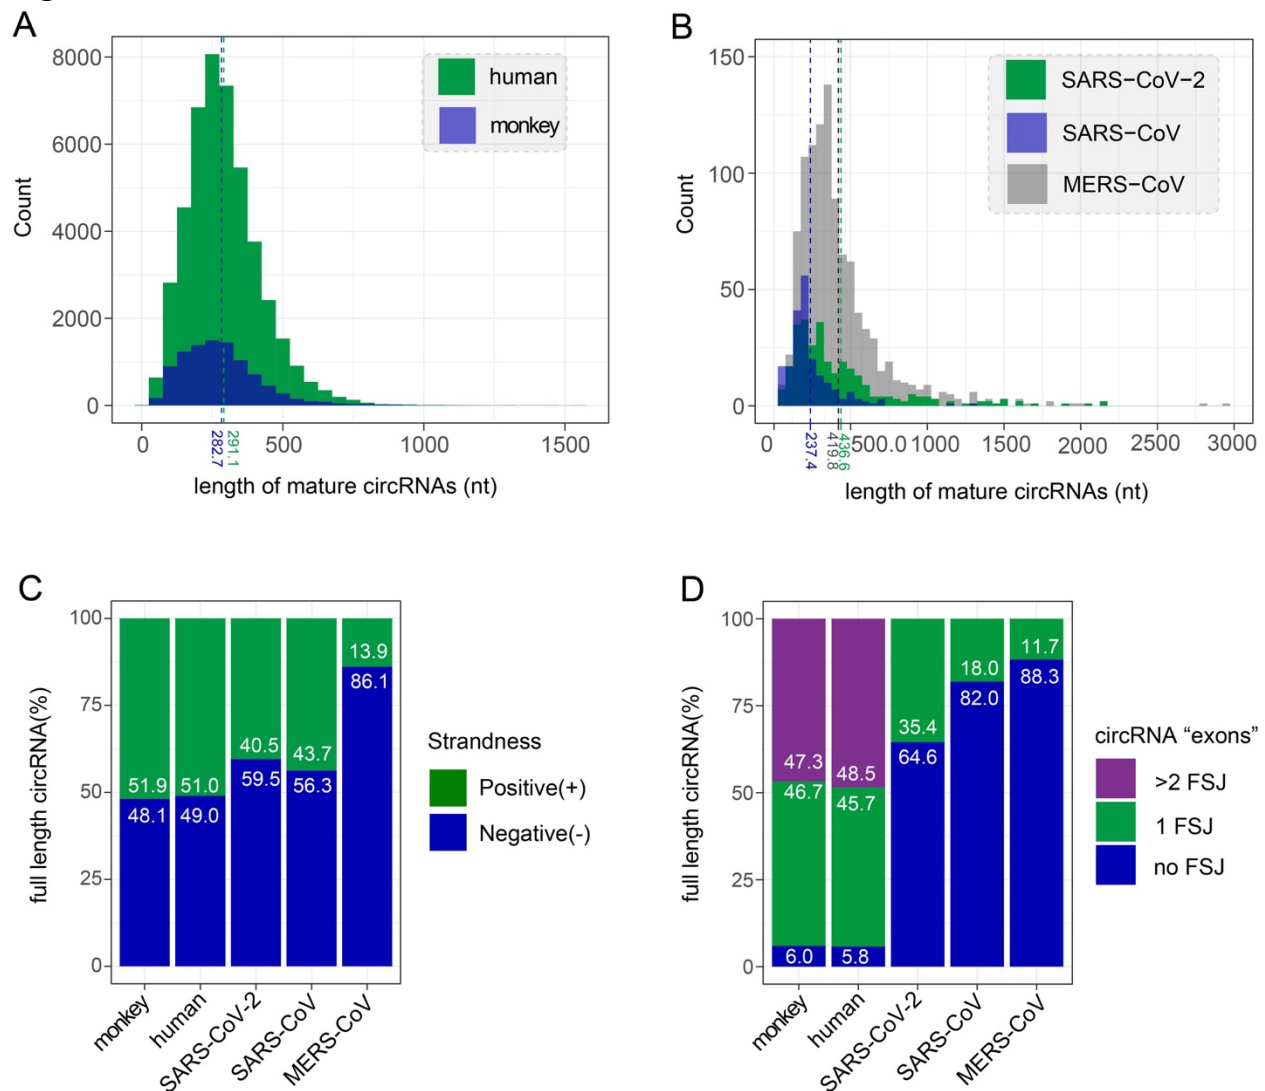

333  
 334 **Figure 2. Comparison of predicted full-length CoV circRNAs and host circRNAs. (A) and**  
 335 **(B) Length distribution of circRNAs derived from host genomes (A) and CoVs (B). Average**  
 336 **length indicated by dashed lines. (C) Strand distribution of host and viral circRNAs. (D)**  
 337 **Distribution of circRNA exons in host and viral circRNAs. Only full-length circRNAs predicted**  
 338 **by CIRI2-full were quantified.**  
 339

340 **Fig. 3**

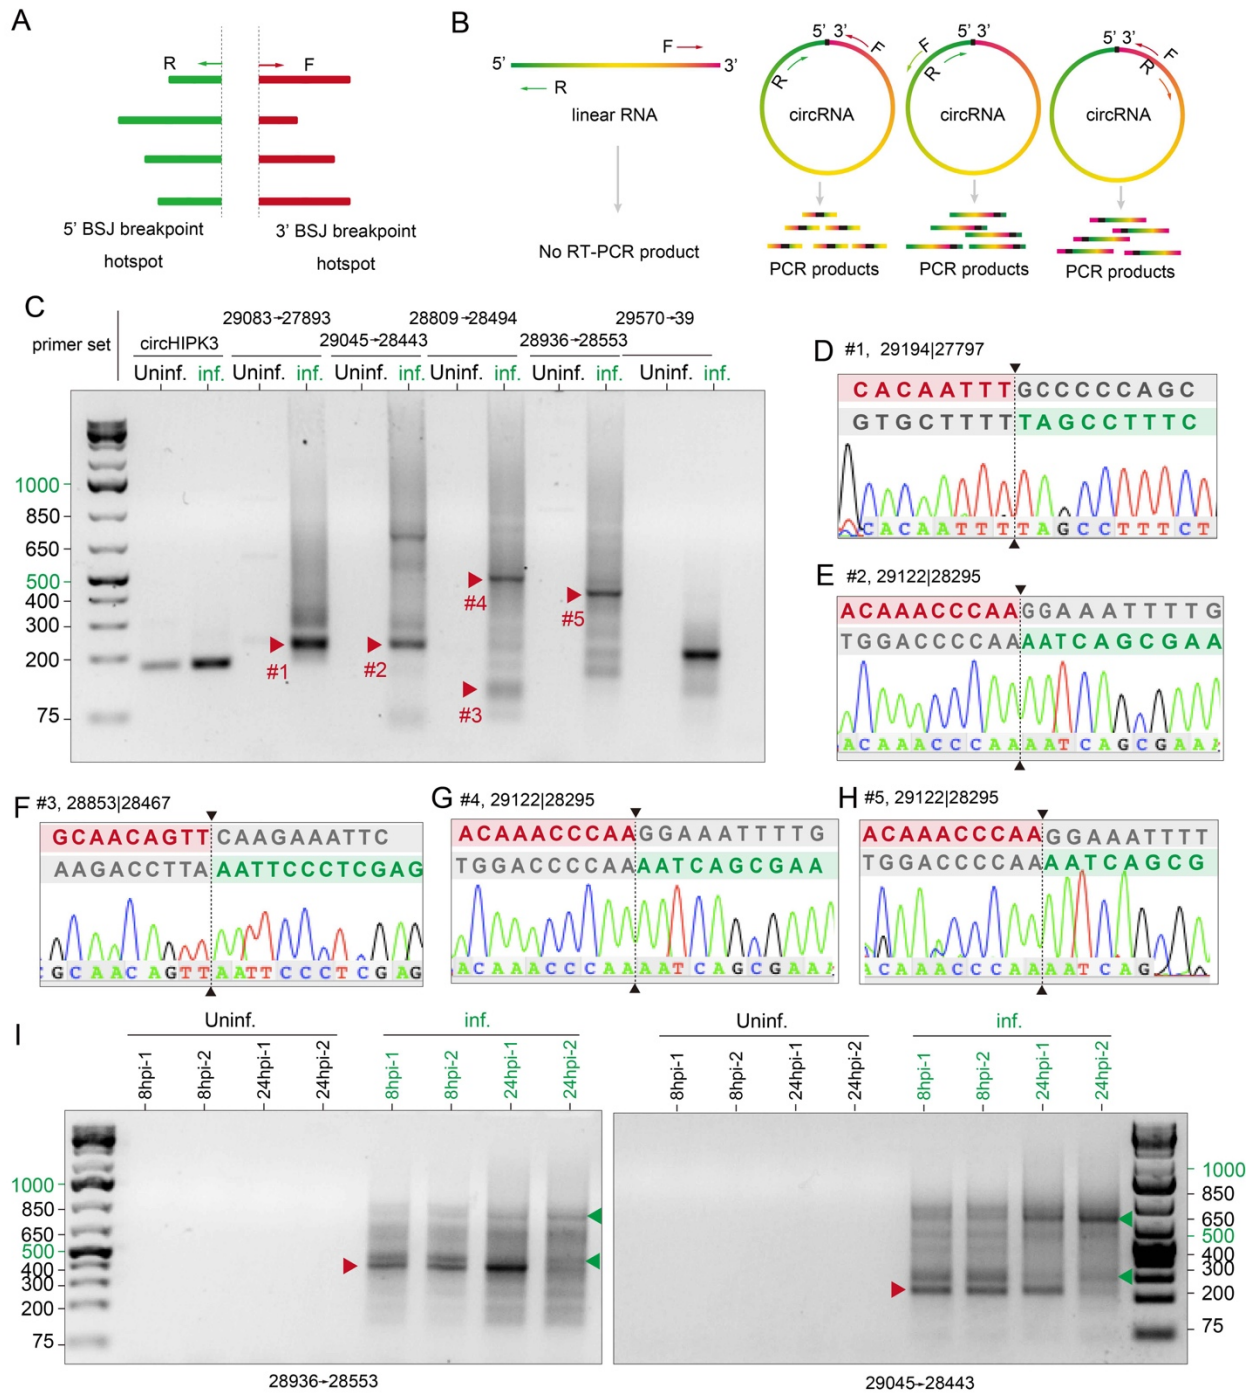

341

342

343 **Figure 3. Experimental validation of SARS-CoV-2 circRNAs in Vero E6 cells. (A)**  
344 Schematic showing divergent primers were designed to amplify all predicted BSJs in a given  
345 hotspot. **(B)** Illustration of BSJ RT-PCR with divergent primers would selectively amplify  
346 different regions of circRNAs but not linear RNAs. **(C)** BSJ RT-PCR with selected primer sets.  
347 Bands indicated by red arrows were gel-purified and sequenced. Note the intensity of most  
348 candidate BSJs were comparable to that of the positive control, circHIPK3 of host origin.  
349 Infection also enhanced the expression of circHIPK3. **(D-H)** Examples of Sanger sequencing  
350 results for PCR products in (C). Sequences around the 3' and 5' breakpoints were aligned to the  
351 BSJ sequence. BSJ Breakpoints were indicated by dashed lines. Donor and acceptor sequences  
352 were highlighted in magenta and green, respectively. Sequences excluded from the circRNA  
353 were shown in grey. **(I)** BSJ RT-PCR probing SARS-CoV-2\_29122|28925 in uninfected and  
354 infected Vero E6 cells at 8hpi and 24hpi. Primer sets were labelled at the bottom of the gels. Red  
355 arrows correspond to bands #5 and #2 in (C). Green arrows indicate candidate circRNAs that are  
356 differentially expressed at early and late stage of infection.

357  
358  
359  
360  
361  
362  
363  
364  
365  
366  
367  
368  
369  
370  
371  
372  
373  
374  
375  
376  
377  
378  
379  
380  
381  
382

## 383 **METHODS AND MATERIALS**

384

### 385 ***De novo* circRNA identification and reconstruction**

386 The analysis workflow was performed on two Intel W-3175X CPUs with 128 GB memory running Ubuntu  
387 system (version 18.04)(28). Adaptor trimmed reads of the same condition were pooled and aligned with  
388 BWA Aligner(25) (BWA-MEM version 0.7.17-R1188) and bowtie2 (version 2.3.5.1)(29) to host and viral  
389 reference genomes: African green monkey (ChlSab1.1.101) for bioproject PRJNA168621; human (hg19)  
390 for bioproject PRJNA31257; SARS-CoV-2 (NC\_045512.2) for bioproject PRJNA485481; SARS-CoV  
391 (NC\_004718.3) for bioproject PRJNA485481; and MERS-CoV (NC\_019843.3) for bioproject  
392 PRJNA485481. Alignment statistics was performed with Qualimap2 (version 2.2.1)(30). CIRI2 (version  
393 v2.0.6)(23) and find\_circ (version 1.2) (31) were used for circRNA calling. Reconstruction of partial and  
394 full length circRNAs was performed with CIRI-full (version 2.0)(24). Default setting was used.

395

### 396 **Quantification and plotting**

397 Quantification and plots were produced using python (version 3.9.0) with plotly module  
398 (<https://plotly.com/python/> and R statistical environment (version 3.4.5) with R package: gggenes  
399 (<https://wilcox.org/gggenes/>, Figure 1B), ggplot2 (other Figures)(32).

400

### 401 **Cell culture, plasmid DNA transfection and SARS-CoV-2 infection**

402 Vero cells (ATCC, CCL-81) and HEK 293T(ATCC® CRL-1573™) were purchased from ATCC. The  
403 cells were maintained in Dulbecco's modified Eagle's medium (DMEM) supplemented with 10% fetal calf  
404 serum (FCS) and penicillin (100 IU/ml)-streptomycin (100 ug/ml) and amphotericin B (2.5 ug/ml) (33).

405 The plasmid, pCAG-nCoV-N-FLAG (34) expresses nucleocapsid (N) gene and was transfected into  
406 HEK 293T cells by transfection reagent, Lipofectamine 3000 (cat# L3000015, Scientific Fisher, USA)  
407 according to the manufacturer's protocol.

408 The SARS-CoV-2 infection experiment was performed in BSL3 labs as described previously (35).  
409 Eight T75 flasks of Vero E6 cells (ATCC No. CRL-1586) formed 90-100% confluency were used. After  
410 washing with DMEM (Life Technologies) twice, four flasks of cell monolayers were inoculated with  
411 SARS-CoV-2 USA-WA1/2020 strain (BEI Resources, NIAID, NIH), which has been passaged one time in  
412 Vero E6 cells after we received it from BEI Resources, diluted in 15 mL of DMEM supplemented with 2%  
413 of heat inactivated (56°C for 30min) fetal bovine serum (Hyclone) and 100 units penicillin/mL, 100 µg  
414 streptomycin/mL, and 0.25 µg amphotericin B/mL (Sigma). We used a multiplicity of infection (MOI) of  
415 0.3 based on 50% tissue culture infectious dose (TCID50). The other four flasks were incubated with  
416 medium only as mock. At 8 hours post-inoculation (hpi) and 24 hpi, we stopped incubating half of the virus-  
417 inoculated and mock flasks by gently pipetting out the culture supernatant. Then we added 5 mL TRIzol™

418 (Invitrogen) into each flask and gently rocked the flasks to distribute the Trizol solution evenly. After  
419 pipetting several times to remove all cells, we transferred the lysates to chloroform-resistance tubes. After  
420 keeping the tubes in room temperature for 5 min to fully lysis the cells, we took 100  $\mu$ L/sample for  
421 inactivation test by performing two rounds of virus isolation in Vero E6 cells. The rest of the samples were  
422 stored at -80°C. After the validation of virus inactivation, the samples were moved out of BSL3 facility for  
423 circRNA analyses in BSL2 laboratories.

424

#### 425 **Experimental detection and analysis of SARS-CoV-2 circRNAs**

426 Detection and analysis of SARS-CoV-2 circRNAs was performed as previously described (36). Total RNA  
427 was isolated using TRizol (ThermoFisher) and Direct-zol RNA miniprep kit (Zymo) from mock-treated  
428 and SARS-CoV-2-infected Vero E6 cells at 8hpi and 24 hpi. RNase R (Lecigen) treatment and follow-up  
429 purification (RNA Clean and Concentrator, Zymo) was performed as described in (36). If RNase R  
430 treatment is opted out, 500ng total RNA was used for reverse transcription (Superscript IV, ThermoFisher)  
431 with random hexamer primers (ThermoFisher). Divergent and convergent primers used in this study are  
432 summarized in Table S1. PCR was performed with GoTaq Master Mix (Promega) with 1ul cDNA template  
433 at 1:20 dilution. Following agarose gel (2%) electrophoresis, candidate circRNA PCR products were size-  
434 selected and gel-purified (Gel purification kit, Zymo) and subcloned with TA cloning kit (ThermoFisher).  
435 At least 8 colonies were checked for insertion of candidate PCR products by PCR with M13 universal  
436 primers. Amplified insertions were PCR purified (DNA purification kit, Zymo) and subjected to Sanger  
437 sequencing by MCLAB, CA. Sequencing results were blasted against SARS-CoV-2 reference genome  
438 (NC\_045512.2). 5' and 3' breakpoints of BSJs and FSJs were manually curated. All commercial reagents  
439 were used according to manufacturer instruction.

440

441 **REFERENCE**

- 442
- 443 1. P. Zhou *et al.*, A pneumonia outbreak associated with a new coronavirus of probable bat  
444 origin. *Nature* **579**, 270-273 (2020).
  - 445 2. V. Coronaviridae Study Group of the International Committee on Taxonomy of, The  
446 species Severe acute respiratory syndrome-related coronavirus: classifying 2019-nCoV  
447 and naming it SARS-CoV-2. *Nat Microbiol* **5**, 536-544 (2020).
  - 448 3. I. Sola, F. Almazan, S. Zuniga, L. Enjuanes, Continuous and Discontinuous RNA Synthesis  
449 in Coronaviruses. *Annu Rev Virol* **2**, 265-288 (2015).
  - 450 4. D. Kim *et al.*, The Architecture of SARS-CoV-2 Transcriptome. *Cell* **181**, 914-921 e910  
451 (2020).
  - 452 5. B. Han, J. Chao, H. Yao, Circular RNA and its mechanisms in disease: From the bench to  
453 the clinic. *Pharmacology & therapeutics* **187**, 31-44 (2018).
  - 454 6. W. R. Jeck *et al.*, Circular RNAs are abundant, conserved, and associated with ALU repeats.  
455 *RNA* **19**, 141-157 (2013).
  - 456 7. X. Li, L. Yang, L. L. Chen, The Biogenesis, Functions, and Challenges of Circular RNAs.  
457 *Molecular cell* **71**, 428-442 (2018).
  - 458 8. Y. Li *et al.*, CircHIPK3 sponges miR-558 to suppress heparanase expression in bladder  
459 cancer cells. *EMBO reports* **18**, 1646-1659 (2017).
  - 460 9. J. N. Vo *et al.*, The Landscape of Circular RNA in Cancer. *Cell* **176**, 869-881 e813 (2019).
  - 461 10. L. Wang, T. Luo, Z. Bao, Y. Li, W. Bu, Intrathecal circHIPK3 shRNA alleviates neuropathic  
462 pain in diabetic rats. *Biochemical and biophysical research communications* **505**, 644-650  
463 (2018).
  - 464 11. Z. Zhou, B. Sun, S. Huang, L. Zhao, Roles of circular RNAs in immune regulation and  
465 autoimmune diseases. *Cell Death Dis* **10**, 503 (2019).
  - 466 12. L. P. Gong *et al.*, Epstein-Barr virus-derived circular RNA LMP2A induces stemness in EBV-  
467 associated gastric cancer. *EMBO Rep*, e49689 (2020).
  - 468 13. J. T. Huang *et al.*, Identification of virus-encoded circular RNA. *Virology* **529**, 144-151  
469 (2019).
  - 470 14. N. Ungerleider *et al.*, The Epstein Barr virus circRNAome. *PLoS Pathog* **14**, e1007206  
471 (2018).
  - 472 15. T. Toptan *et al.*, Circular DNA tumor viruses make circular RNAs. *Proceedings of the*  
473 *National Academy of Sciences of the United States of America* **115**, E8737-E8745 (2018).
  - 474 16. T. Tagawa *et al.*, Discovery of Kaposi's sarcoma herpesvirus-encoded circular RNAs and a  
475 human antiviral circular RNA. *Proc Natl Acad Sci U S A* **115**, 12805-12810 (2018).
  - 476 17. B. Abere *et al.*, Kaposi's Sarcoma-Associated Herpesvirus-Encoded circRNAs Are  
477 Expressed in Infected Tumor Tissues and Are Incorporated into Virions. *mBio* **11**, (2020).
  - 478 18. J. Zhao *et al.*, Transforming activity of an oncoprotein-encoding circular RNA from human  
479 papillomavirus. *Nature communications* **10**, 2300 (2019).
  - 480 19. P. Glazar, P. Papavasileiou, N. Rajewsky, circBase: a database for circular RNAs. *RNA* **20**,  
481 1666-1670 (2014).
  - 482 20. H. Chu *et al.*, Comparative tropism, replication kinetics, and cell damage profiling of SARS-  
483 CoV-2 and SARS-CoV with implications for clinical manifestations, transmissibility, and  
484 laboratory studies of COVID-19: an observational study. *Lancet Microbe* **1**, e14-e23 (2020).

- 485 21. L. Riva *et al.*, Discovery of SARS-CoV-2 antiviral drugs through large-scale compound  
486 repurposing. *Nature* **586**, 113-119 (2020).
- 487 22. X. Zhang *et al.*, Competing endogenous RNA network profiling reveals novel host  
488 dependency factors required for MERS-CoV propagation. *Emerg Microbes Infect* **9**, 733-  
489 746 (2020).
- 490 23. Y. Gao, J. Zhang, F. Zhao, Circular RNA identification based on multiple seed matching.  
491 *Brief Bioinform* **19**, 803-810 (2018).
- 492 24. Y. Zheng, P. Ji, S. Chen, L. Hou, F. Zhao, Reconstruction of full-length circular RNAs enables  
493 isoform-level quantification. *Genome Med* **11**, 2 (2019).
- 494 25. H. Li, R. Durbin, Fast and accurate short read alignment with Burrows-Wheeler transform.  
495 *Bioinformatics* **25**, 1754-1760 (2009).
- 496 26. A. Kos, R. Dijkema, A. C. Arnberg, P. H. van der Meide, H. Schellekens, The hepatitis delta  
497 (delta) virus possesses a circular RNA. *Nature* **323**, 558-560 (1986).
- 498 27. C. L. Zena Cai, Jun He, Li Liu, Yuanqiang Zou, Zheng Zhang, Zhaozhong Zhu, Xingyi Ge,  
499 Aiping Wu, Taijiao Jiang, Heping Zheng, Yousong Peng, Identification and  
500 characterization of circRNAs encoded by MERS-CoV, SARS-CoV-1 and SARS-CoV-2.  
501 *Briefings in Bioinformatics*, (2020).
- 502 28. S. Yang *et al.*, Transcriptomic analysis reveals novel mechanisms of SARS-CoV-2 infection  
503 in human lung cells. *Immun Inflamm Dis* **8**, 753-762 (2020).
- 504 29. B. Langmead, S. L. Salzberg, Fast gapped-read alignment with Bowtie 2. *Nature methods*  
505 **9**, 357-359 (2012).
- 506 30. K. Okonechnikov, A. Conesa, F. Garcia-Alcalde, Qualimap 2: advanced multi-sample  
507 quality control for high-throughput sequencing data. *Bioinformatics* **32**, 292-294 (2016).
- 508 31. S. Memczak *et al.*, Circular RNAs are a large class of animal RNAs with regulatory potency.  
509 *Nature* **495**, 333-338 (2013).
- 510 32. K. Ito, D. Murphy, Application of ggplot2 to Pharmacometric Graphics. *CPT*  
511 *Pharmacometrics Syst Pharmacol* **2**, e79 (2013).
- 512 33. A. de Bruyn Kops, D. M. Knipe, Formation of DNA replication structures in herpes virus-  
513 infected cells requires a viral DNA binding protein. *Cell* **55**, 857-868 (1988).
- 514 34. J. Zhang *et al.*, A systemic and molecular study of subcellular localization of SARS-CoV-2  
515 proteins. *Signal Transduct Target Ther* **5**, 269 (2020).
- 516 35. J. B. Case, A. L. Bailey, A. S. Kim, R. E. Chen, M. S. Diamond, Growth, detection,  
517 quantification, and inactivation of SARS-CoV-2. *Virology* **548**, 39-48 (2020).
- 518 36. A. C. Panda, M. Gorospe, Detection and Analysis of Circular RNAs by RT-PCR. *Bio Protoc* **8**,  
519 (2018).
- 520
